# Supplementary material
Source: ML conference proceedings conference paper supplement (https://openaccess.thecvf.com/content/CVPR2024/html/Zhang_BerfScene_Bev-conditioned_Equivariant_CVPR_2024_paper.html)
Supplement: Supplementary file 1 [file Zhang_BerfScene_Bev-conditioned_Equivariant_CVPR_2024_supplemental.zip]

Archive with 4 entries (4 files):
- BerfScene_demo.mp4
- __MACOSX/._BerfScene_demo.mp4
- CVPR2024_BerfScene_supp.pdf
- __MACOSX/._CVPR2024_BerfScene_supp.pdf
